# Supplementary material for: Photoelectrocatalytic activity of In(iii)-modified TiO2 photoanodes in the visible spectrum region
Source: Royal Society of Chemistry journal article supplement (doi:10.1039/d0nj03162c), 2020-01-01
Supplement: d0nj03162c1.pdf [file d0nj03162c1.pdf]

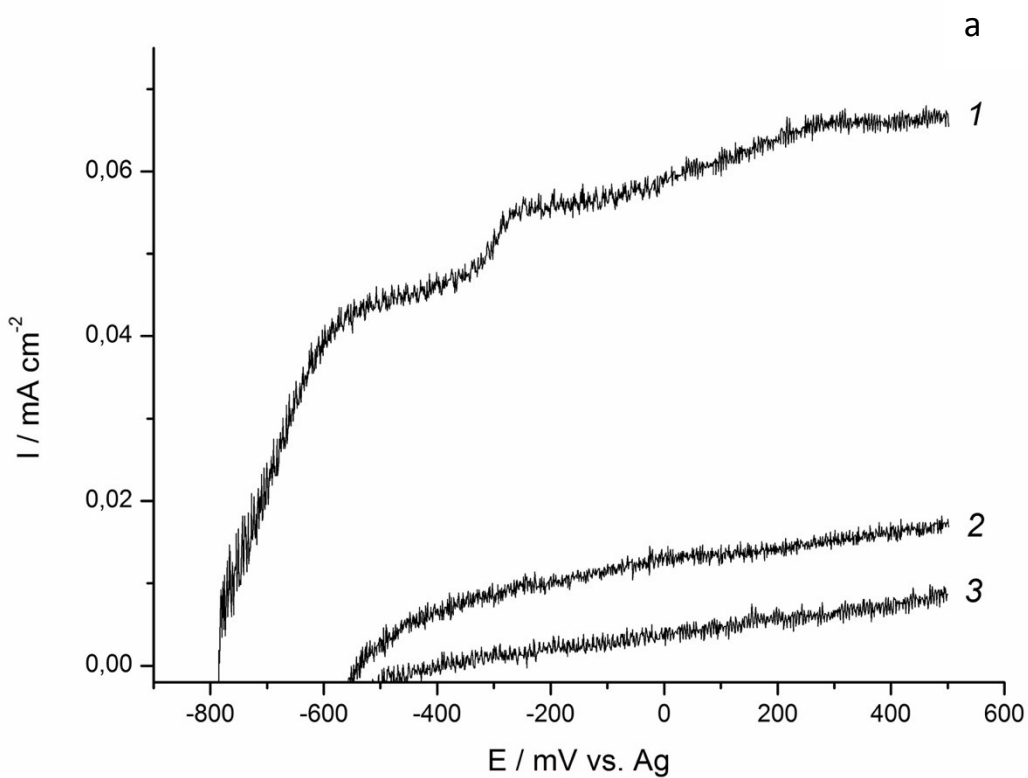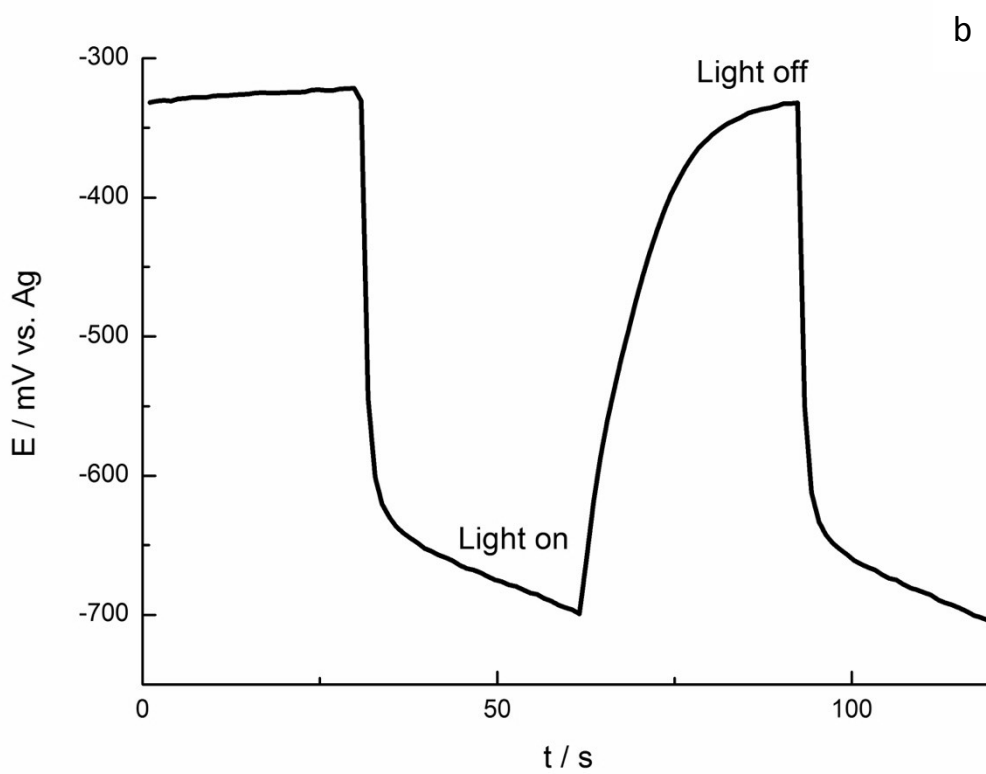

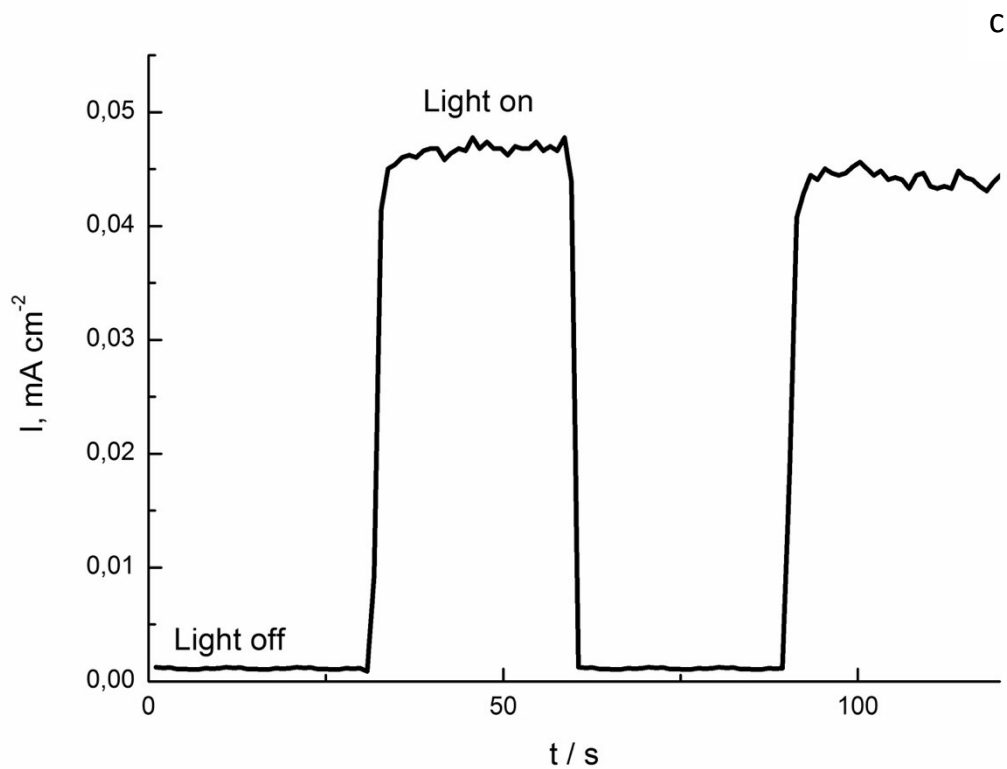

Fig.S1. (a) Voltammograms obtained at the (1)  $n$ -TiO<sub>2</sub> + 0.23 at % In; (2)  $n$ -TiO<sub>2</sub> + 1.21 at. % In; and (3)  $n$ -TiO<sub>2</sub> + 2.52 at. % In film photoanodes in a 0.1 M KOH + 200  $\mu$ l (4.9 mM) CH<sub>3</sub>OH aqueous solution under monochromatic light illumination. Potential scan rate is 0.01 V s<sup>-1</sup>.

(b, c) Transients of photopotential (b) and photocurrent (c) obtained at the  $n$ -TiO<sub>2</sub> + 0.23 at.% In photoanode' potential  $E = 0.0$  V in a 0.1 M KOH + 200  $\mu$ l (4.9 mM) CH<sub>3</sub>OH aqueous solution in "dark" conditions and under illumination. Illumination conditions: xenon lamp (150 W) with a 461 nm filter; illumination power at the photoanode is 10 mW cm<sup>-2</sup>.

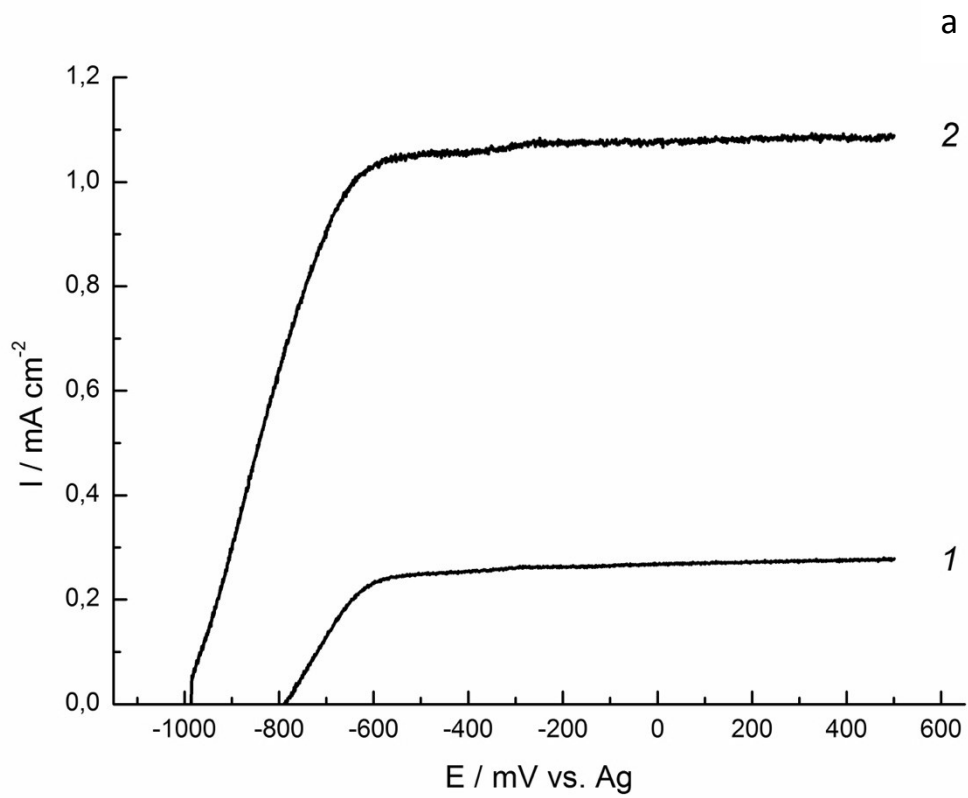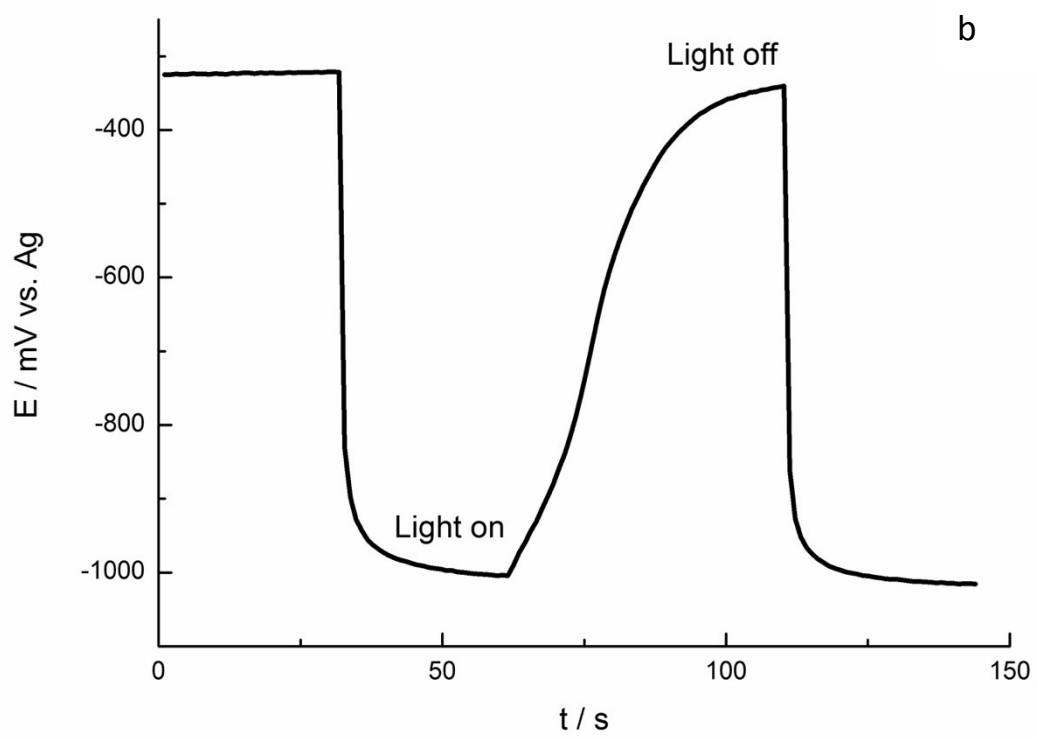

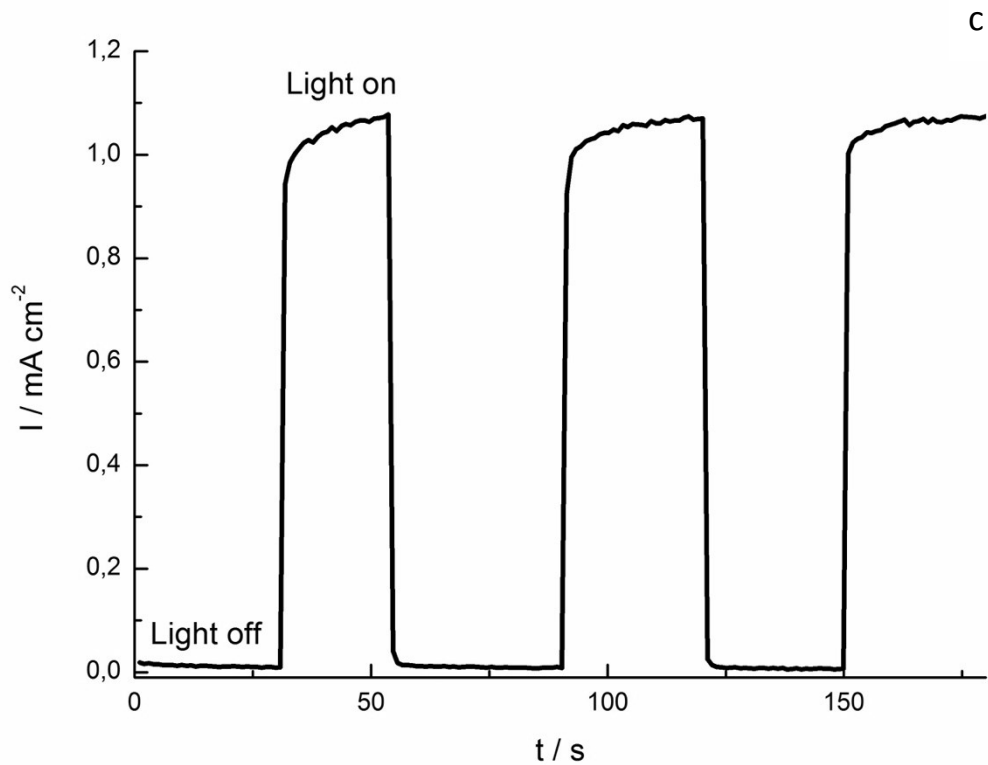

Fig. S2. (a) Voltammograms obtained at the ( $n$ -TiO<sub>2</sub> + 0.23 at % In) film photoanode under visible light illumination in (1) 0.1 M KOH and (2) 0.1 M KOH + 200  $\mu$ l (4.9 mM) CH<sub>3</sub>OH aqueous solutions.

Potential scan rate is 0.01 V s<sup>-1</sup>.

(b, c) Transients of photopotential (b) and photocurrent (c) obtained at the photoanode's potential  $E = 0.0$  V in a 0.1 M KOH + 200  $\mu$ l (4.9 mM) CH<sub>3</sub>OH aqueous solution in “dark” conditions and under illumination. Illumination conditions: xenon lamp with a UV filter; illumination power at the photoanode is 100 mW cm<sup>-2</sup>.

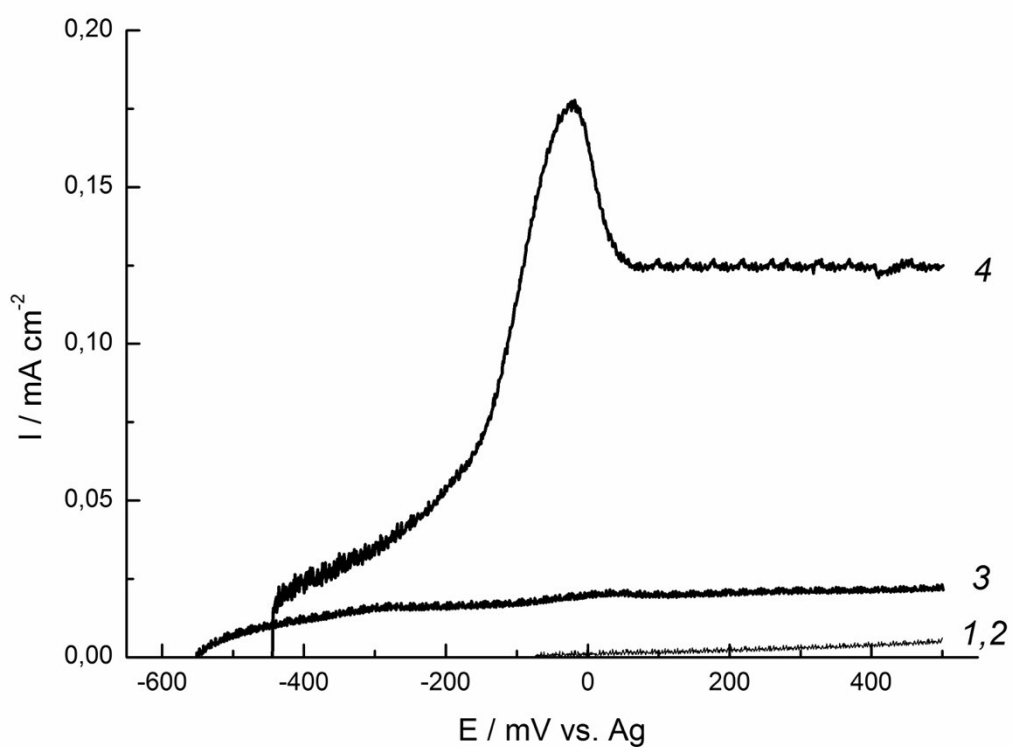

Fig.S3. Voltammograms obtained at the (*n*-TiO<sub>2</sub> + 0.23 at % In) film photoanode in “dark” conditions (1, 2) and under monochromatic light illumination (3, 4) in 0.1 M KOH (1, 3) and 0.1 M KOH + 350  $\mu\text{l}$  (9.2 mM) HCOOH (2, 4) aqueous solutions. Potential scan rate is 0.01 V s<sup>-1</sup>. Illumination conditions: xenon lamp (150 W) with a 461 nm filter; illumination power at the photoanode is 10 mW cm<sup>-2</sup>.

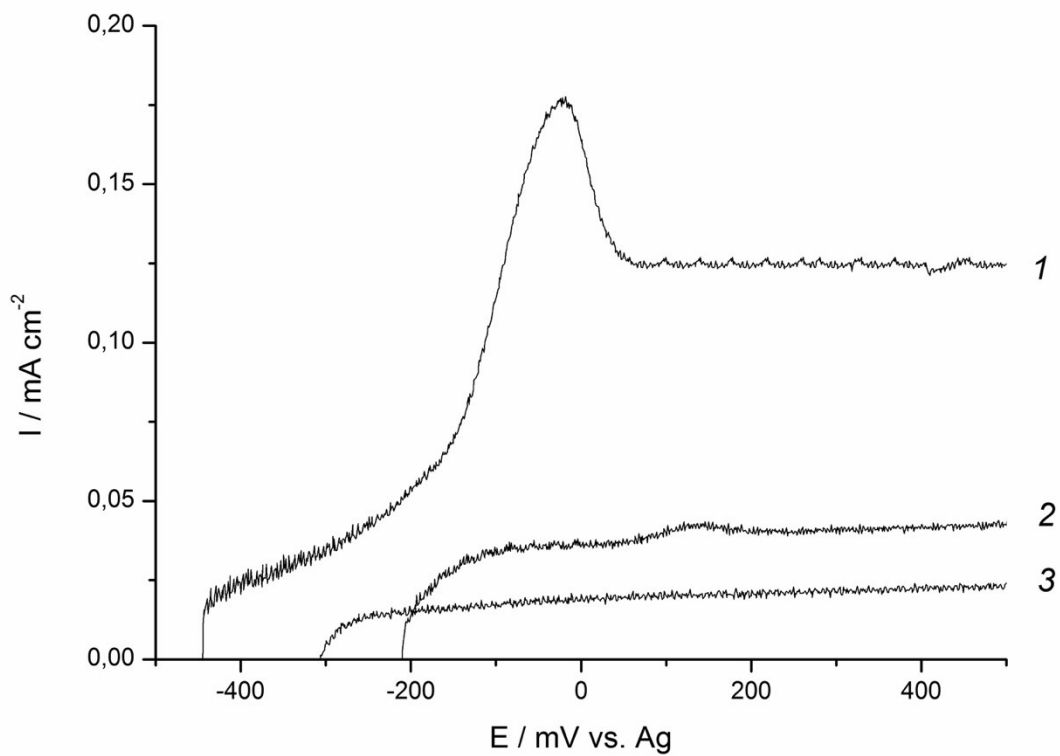

Fig.S4. Voltammograms obtained at the  $n\text{-TiO}_2 + 0.23 \text{ at. \% In}$  (1);  $n\text{-TiO}_2 + 1.21 \text{ at. \% In}$  (2); and  $n\text{-TiO}_2 + 2.52 \text{ at. \% In}$  (3) film photoanodes in a 0.1 M KOH + 350  $\mu\text{l}$  (9.2 mM) HCOOH aqueous solution under monochromatic light illumination. Potential scan rate is  $0.01 \text{ V s}^{-1}$ . Illumination conditions: xenon lamp (150 W) with a 461 nm filter; illumination power at the photoanode is  $10 \text{ mW cm}^{-2}$ .

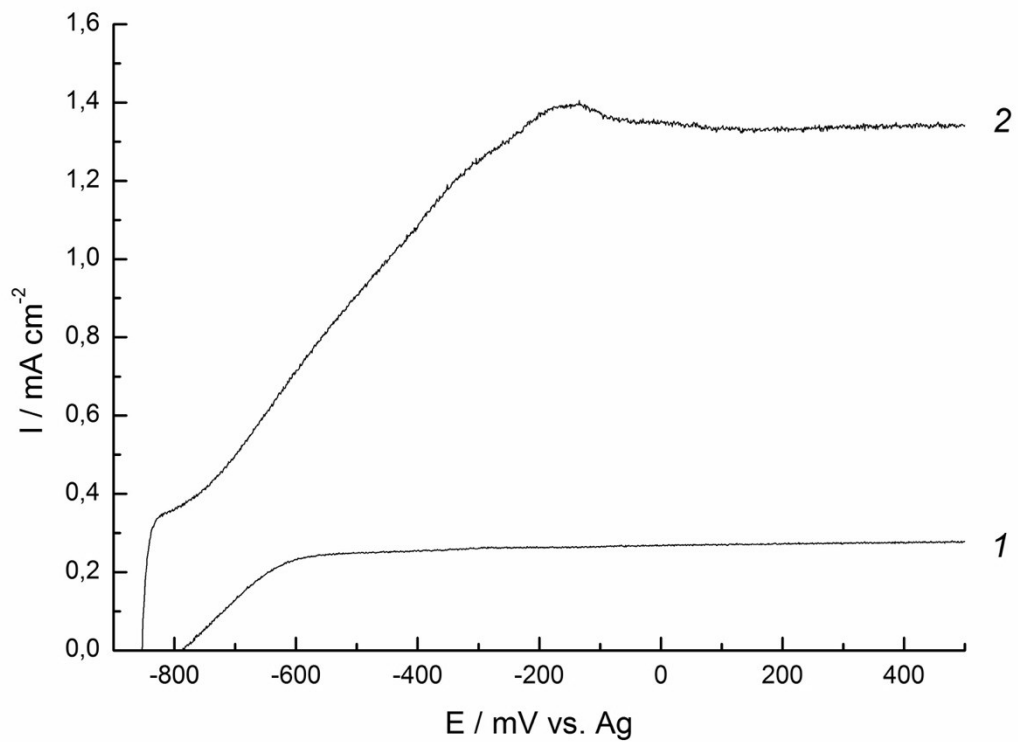

Fig.S5. Voltammograms obtained at the  $n$ -TiO<sub>2</sub> + 0.23 at % In film photoanode in (1) 0.1 M KOH; and (2) 0.1 M KOH + 350  $\mu\text{l}$  (9.2 mM) HCOOH aqueous solutions under visible light illumination. Potential scan rate is 0.01  $\text{V s}^{-1}$ . Illumination conditions: xenon lamp with a UV filter; illumination power at the photoanode is 100  $\text{mW cm}^{-2}$ .

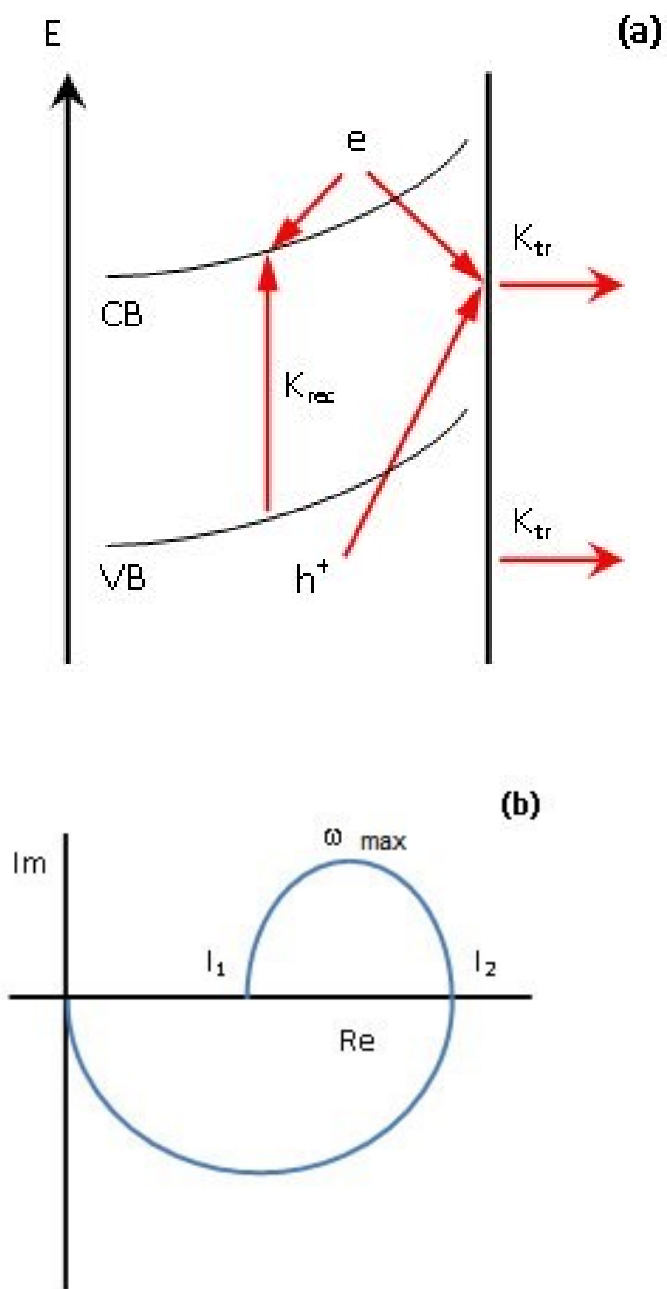

Fig. S6. Scheme (a) illustrates the process of generation of holes on the surface of the photoanode; scheme (b) illustrates the IMPS graph.



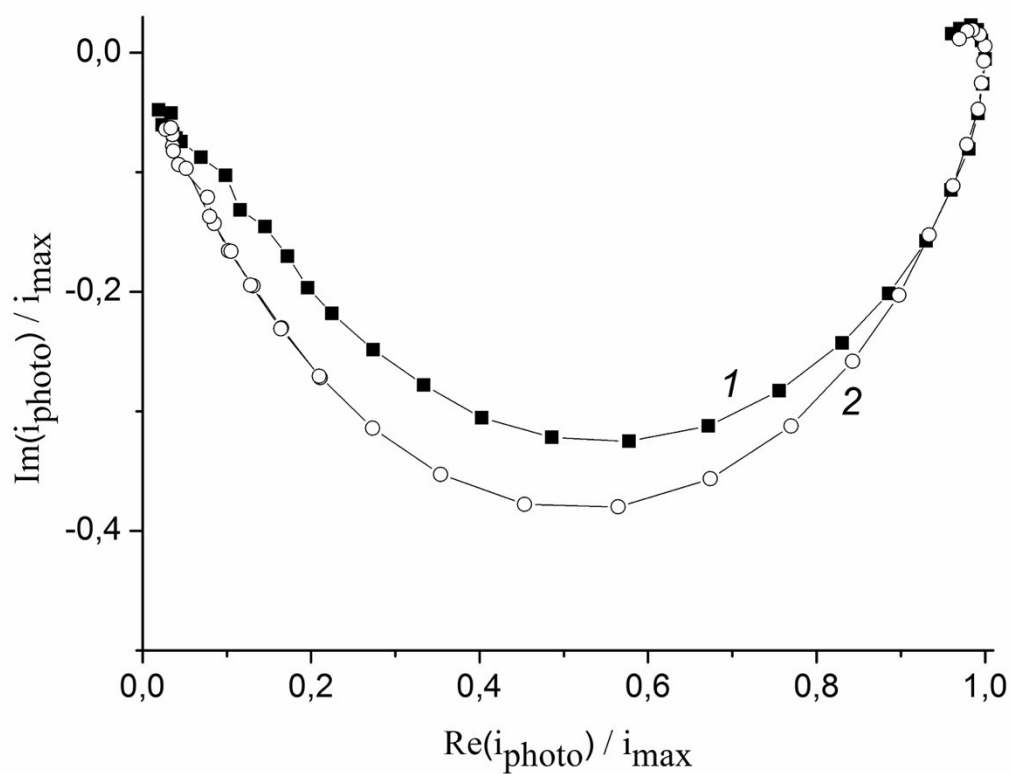

Fig.S7. Normalized IMPS spectra obtained at -0.8 V in a 0.1 M KOH + 200  $\mu$ l (4.9 mM) MeOH aqueous solution at (1)  $\text{TiO}_2$  + 0.23 at. % In; and (2)  $\text{TiO}_2$  + 2.52 at. % In photoanodes under monochromatic light illumination (369 nm; 7.5  $\text{mW cm}^{-2}$ ).

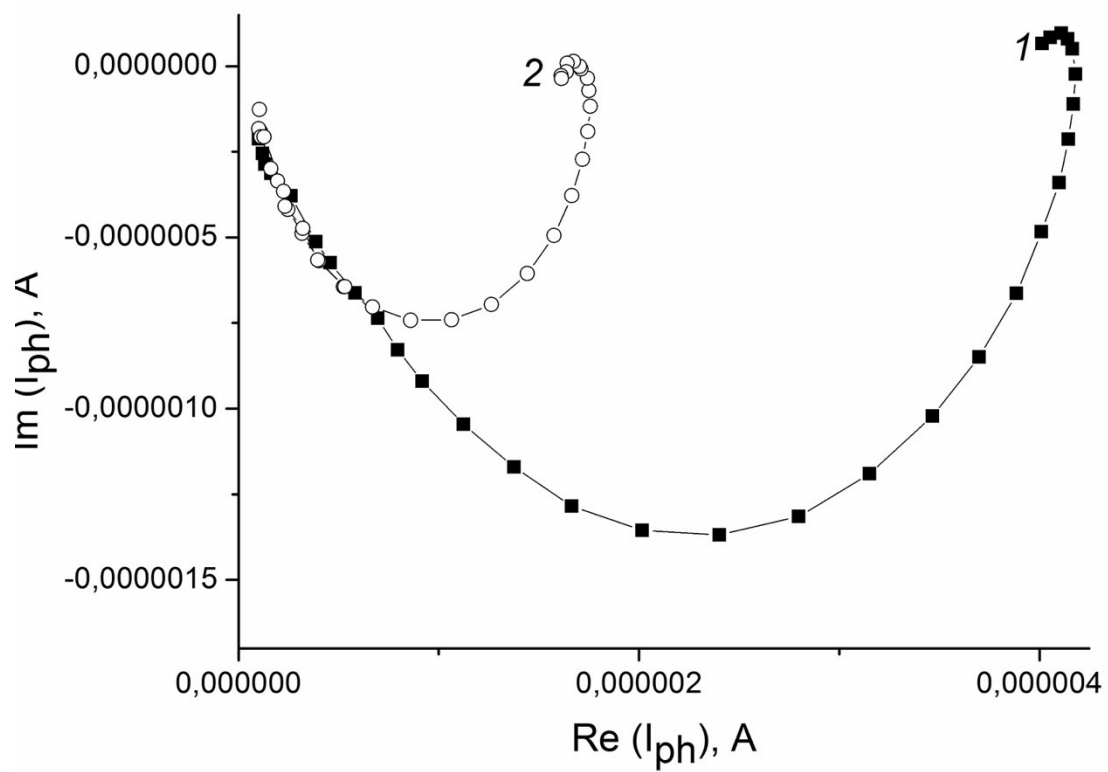

Fig.S8. IMPS spectra obtained at -0.8 V in a 0.1 M KOH + 200  $\mu\text{l}$  (4.9 mM) MeOH aqueous solution at (1)  $\text{TiO}_2$  + 0.23 at. % In; and (2)  $\text{TiO}_2$  + 2.52 at. % In photoanodes under monochromatic light illumination (369 nm; 7.5  $\text{mW cm}^{-2}$ ).
